# Supplementary material for: Condenson-related thermoelectric properties and formation of coherent nanoinclusions in Te-substituted In4Se3 compounds
Source: Royal Society of Chemistry journal article supplement (doi:10.1039/c3ta12408h), 2013-01-01

Supplementary information for:

## **Condenson-related thermoelectric properties and formation of coherent nanoinclusions in Te-substituted In<sub>4</sub>Se<sub>3</sub>**

Mahn Jeong,<sup>a,b</sup> Young Soo Lim,<sup>\*a</sup> Won-Seon Seo,<sup>a</sup> Jong-Heun Lee,<sup>b</sup> Cheol-Hee Park,<sup>c</sup>  
Malgorzata Sznajder,<sup>d</sup> Lyubov Yu. Kharkhalis,<sup>e</sup> Dariya M. Bercha,<sup>e</sup> and Jihui Yang<sup>f</sup>

<sup>a</sup> Energy and Environmental Division, Korea Institute of Ceramic Engineering and Technology, Seoul, Korea, <sup>b</sup> Department of Materials Science and Engineering, Korea University, Seoul, Korea, <sup>c</sup> Corporate R&D, LG Chem/Research Park, Daejeon, Korea, <sup>d</sup> Institute of Physics, University of Rzeszow, Rzeszow, Poland, <sup>e</sup> Institute of Physics and Chemistry of Solid State, Uzhgorod National University, Uzhgorod, Ukraine, <sup>f</sup> Department of Materials Science and Engineering, University of Washington, Seattle, USA.

Corresponding author E-mail: [yslim@kicet.re.kr](mailto:yslim@kicet.re.kr) (Y.S. Lim)

Table S1. EDS point analysis results at five arbitrary points from the matrix and from the nanoinclusions in  $\text{In}_4(\text{Se}_{0.95}\text{Te}_{0.05})_{2.6}$  compound.

| Point analysis | Matrix   |          |          | Nanoinclusion |          |          |
|----------------|----------|----------|----------|---------------|----------|----------|
|                | In (wt%) | Se (wt%) | Te (wt%) | In (wt%)      | Se (wt%) | Te (wt%) |
| #1             | 69.84    | 28.52    | 1.64     | 85.11         | 14.35    | 0.54     |
| #2             | 71.42    | 26.83    | 1.75     | 77.05         | 22.42    | 0.54     |
| #3             | 68.68    | 29.25    | 2.07     | 75.79         | 24.39    | -0.18    |
| #4             | 69.41    | 29.36    | 1.23     | 78.65         | 23.60    | -2.24    |
| #5             | 69.97    | 28.48    | 1.54     | 80.39         | 19.43    | 0.18     |
| Average        | 69.90    | 28.50    | 1.60     | 79.40         | 20.80    | -0.20    |

Table S2. EDS point analysis results at five arbitrary points from the matrix and from the nanoinclusions in  $\text{In}_4\text{Se}_{2.6}$  compound.

| Point analysis | Matrix   |          | Nanoinclusion |          |
|----------------|----------|----------|---------------|----------|
|                | In (wt%) | Se (wt%) | In (wt%)      | Se (wt%) |
| #1             | 69.29    | 30.71    | 71.50         | 23.50    |
| #2             | 70.99    | 29.01    | 83.16         | 16.84    |
| #3             | 66.28    | 33.72    | 72.29         | 27.71    |
| #4             | 70.25    | 29.75    | 75.01         | 24.99    |
| #5             | 72.31    | 27.69    | 81.69         | 18.31    |
| Average        | 69.80    | 30.20    | 76.70         | 23.30    |

Figure S1. A HRTEM micrograph of cation-substituted  $(\text{In}_{0.98}\text{Sn}_{0.02})_4\text{Se}_{2.6}$  compound along  $\langle 001 \rangle$  zone axis.

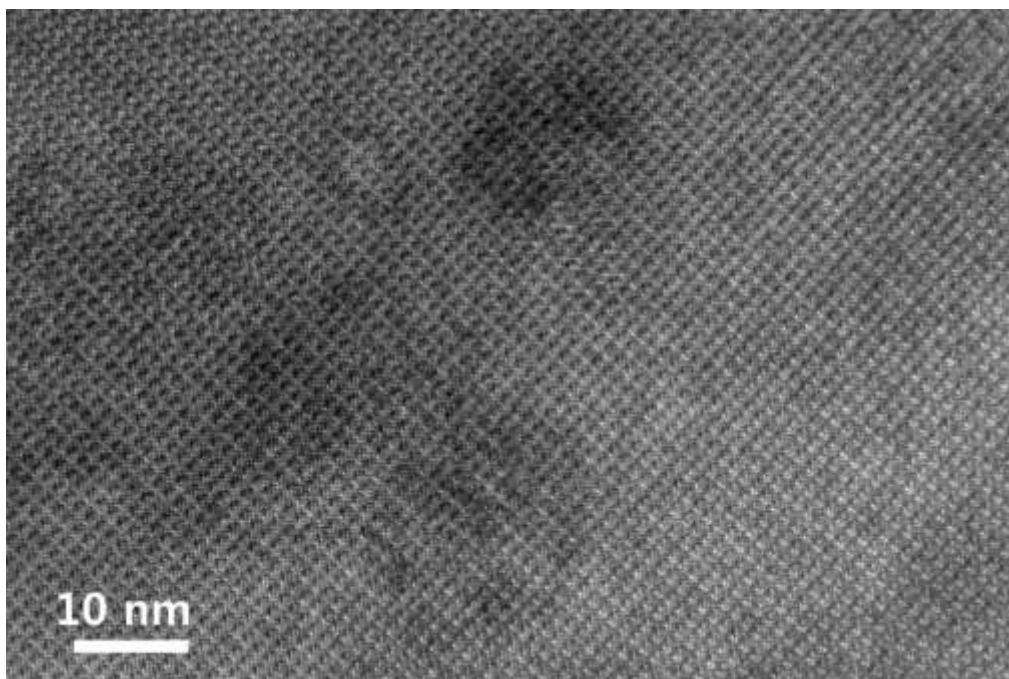

Figure S2. XRD patterns of unalloyed  $\text{In}_4\text{Se}_{2.6}$  and Te-substituted  $\text{In}_4\text{Se}_{3-\delta}$  (IST) compounds. Although a tiny amount of metallic indium was detected, all samples were mostly composed of  $\text{In}_4\text{Se}_3$  phase. However, no extra XRD peak originating from the nanoinclusion could be observed in the XRD patterns.

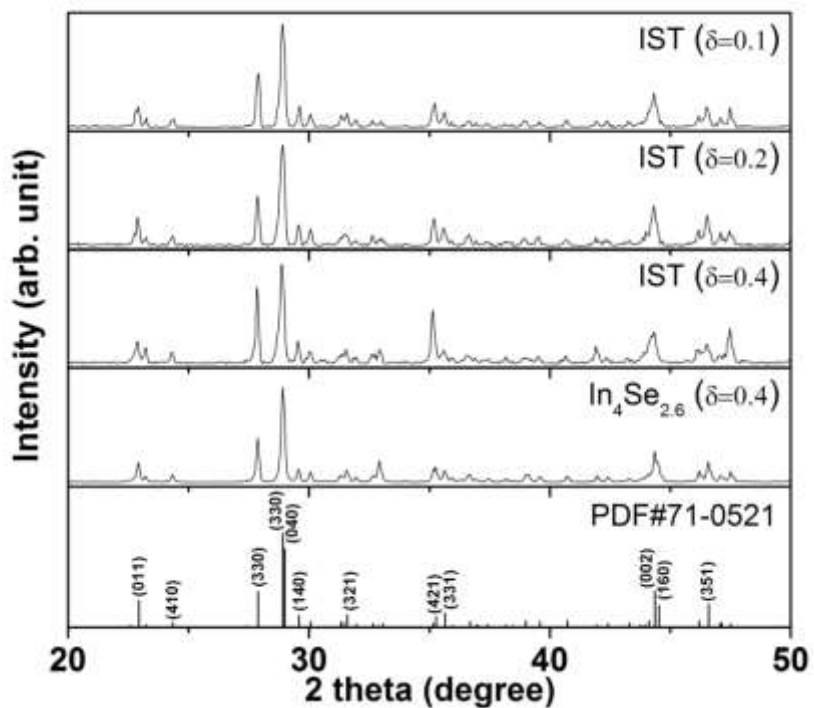

Figure S3. A SEM micrograph of a fractured surface of unalloyed  $\text{In}_4\text{Se}_{2.6}$  compound.

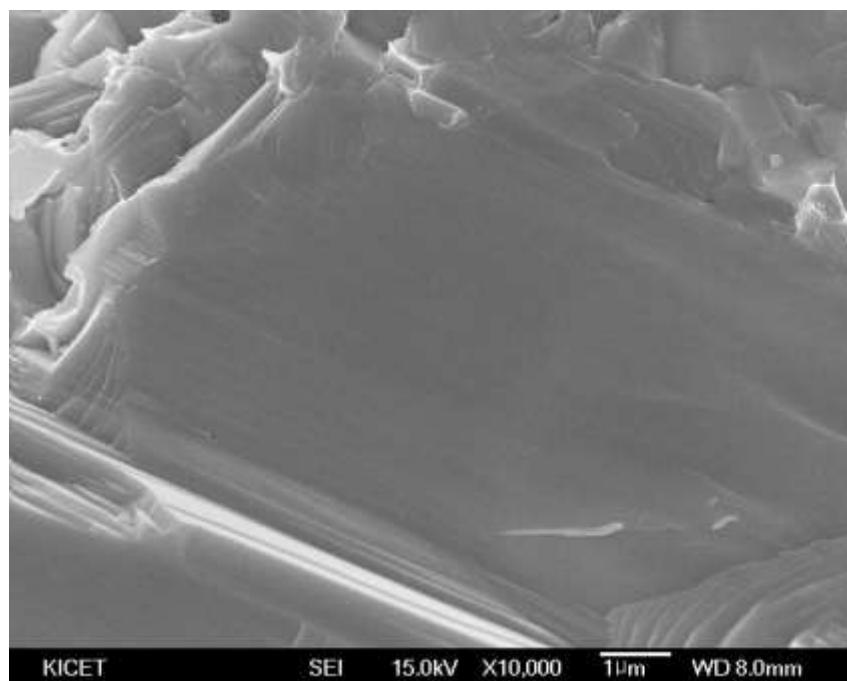

Figure S4. (a) A low-magnification bright-field TEM micrograph of unalloyed  $\text{In}_4\text{Se}_{2.6}$ . (b) and (c) are enlarged bright-field TEM micrographs of Grain A and B, respectively. In these figures, the wide distribution of the nanoinclusions can be clearly observed.

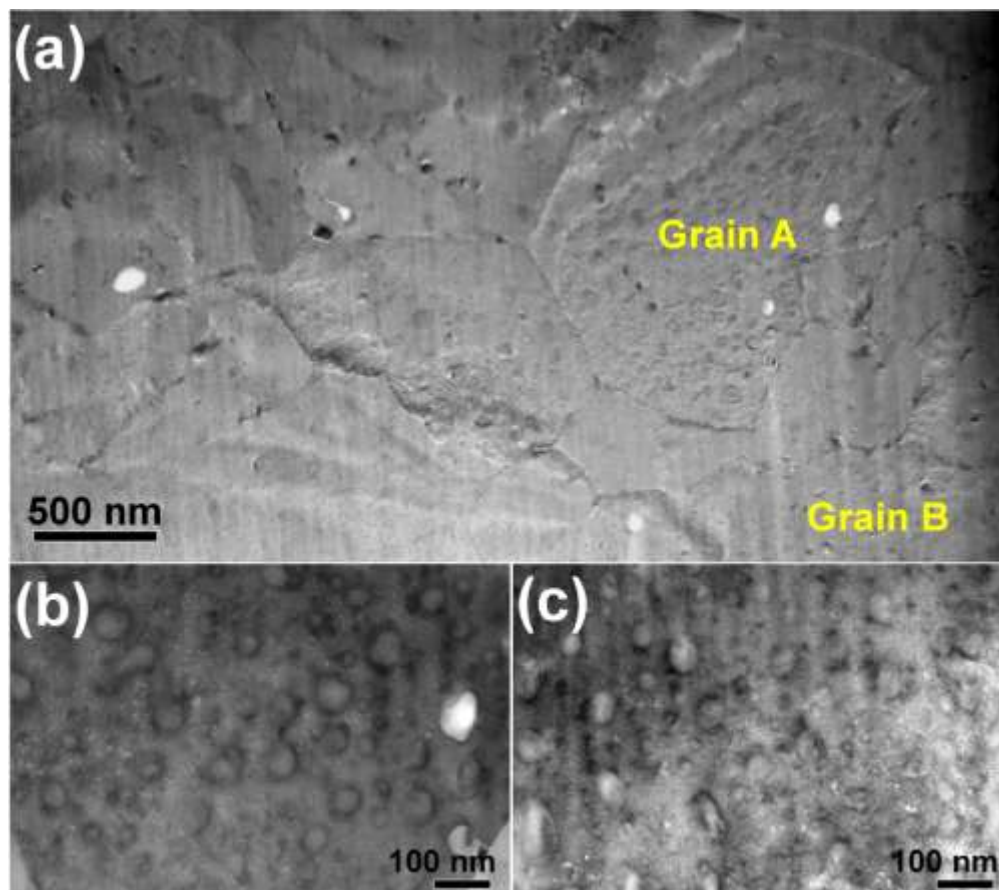

Supplement: c3ta12408h.pdf [file c3ta12408h.pdf]
